# Supplementary material for: Effects of organic cations on the defect physics of tin halide perovskites
Source: Royal Society of Chemistry journal article supplement (doi:10.1039/c7ta02662e), 2017-01-01
Supplement: c7ta02662e1.pdf [file c7ta02662e1.pdf]

## Supporting Information

### Effects of Organic Cation on the Defect Physics of Tin Halide Perovskites

Tingting Shi<sup>1\*</sup>, Hai-Shan Zhang<sup>2</sup>, Weiwei Meng<sup>3</sup>, Qiang Teng<sup>2</sup>, Meiyue Liu<sup>1,4</sup>, Xiaobao Yang<sup>1,2</sup>, Yanfa Yan<sup>3</sup>, Hin-Lap Yip<sup>1,4\*</sup> and Yu-Jun Zhao<sup>1,2\*</sup>

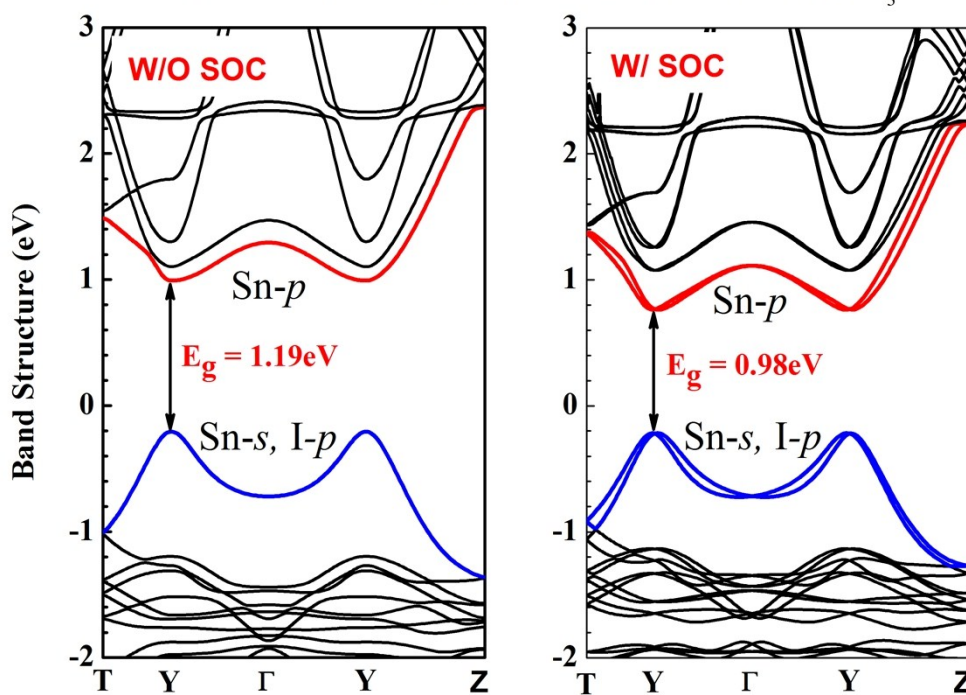

Fig. 1S The band structures of FASnI<sub>3</sub> based on PBE and PBE with SOC calculations

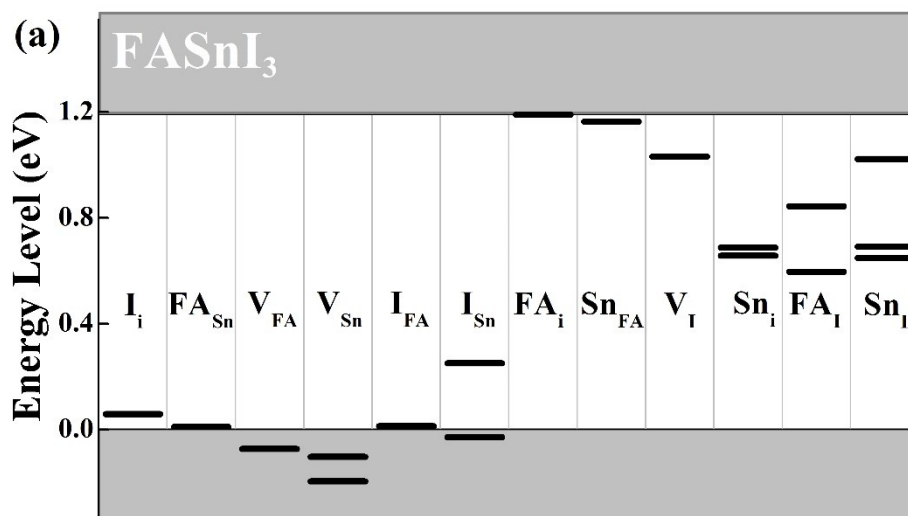

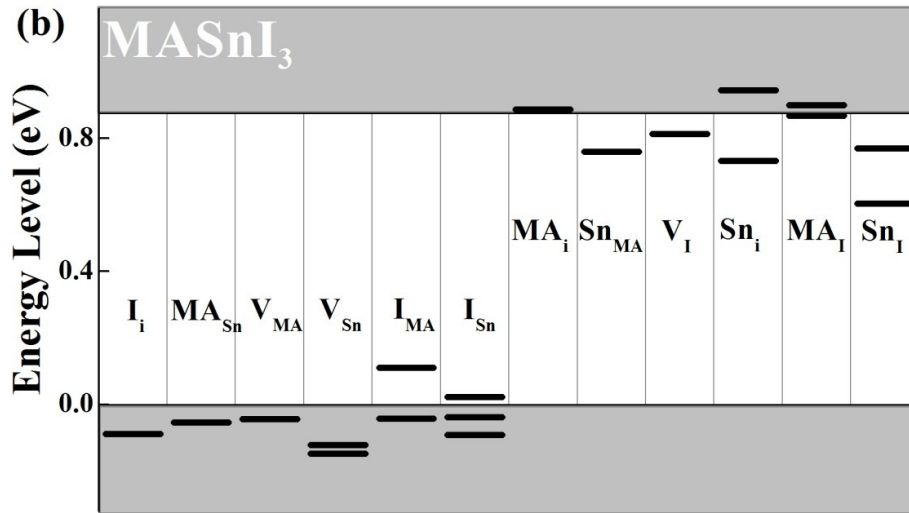

**Fig. 2S** The transition energy levels of various intrinsic acceptors and donors (a) FASnI<sub>3</sub> system and (b) MASnI<sub>3</sub> system.

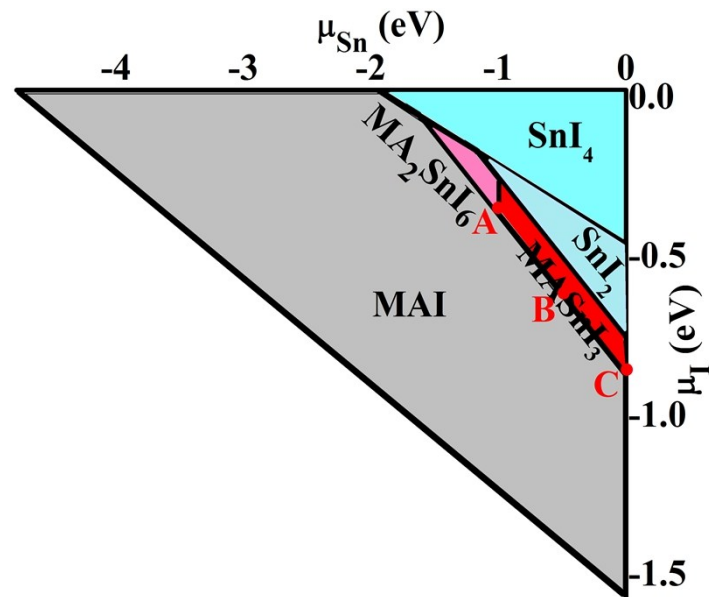

**Fig. 3S** Thermodynamic stable range for equilibrium growth of MASnI<sub>3</sub> and three typical chemical environments, marked by A, B and C.
